# Supplementary material
Source: Springer Nature journal article supplement (https://www.springermedizin.de/resource/supplementary/12936_2014_3366_MOESM8_ESM.pdf/9545740)

# Functionnal classification of genes

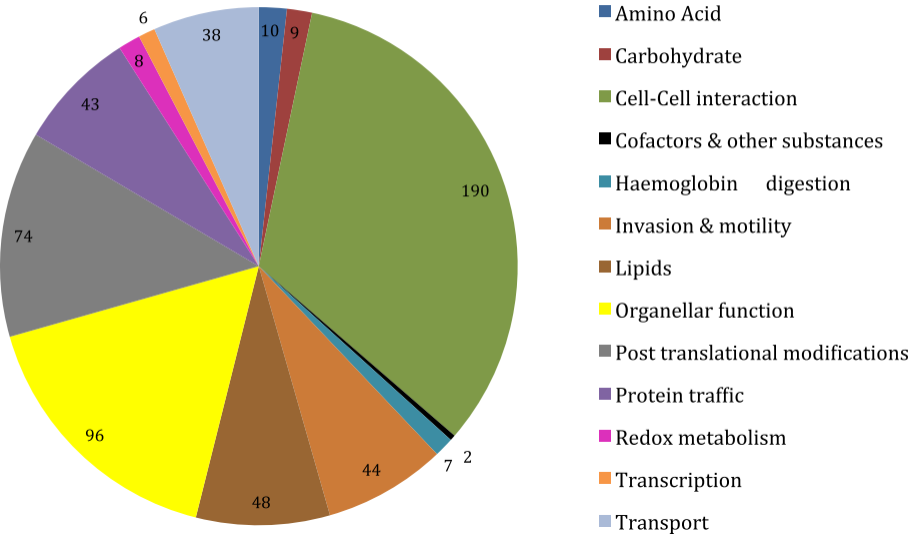

Supplement: MOESM8 [file 9545740]
